# Supplementary material for: Comparative Analysis of Subjective Indoor Environment Assessment in Actual and Simulated Conditions
Source: MDPI journal article supplement (doi:10.3390/en17030656), 2024-01-30
Supplement: s1 [file s1]

**Table S1.** Geometrical details of the educational rooms together with time and outside air temperature data.

| No | Surface area,<br>m <sup>2</sup> | Cubature,<br>m <sup>3</sup> | Outside air tempera-<br>ture, °C | Time of measurement,<br>day/hour |
|----|---------------------------------|-----------------------------|----------------------------------|----------------------------------|
| 1  | 160.9                           | 466.5                       | 7.5                              | 19. March, 10.20 a.m.            |
| 2  | 63.9                            | 185.3                       | 22.0                             | 10. June, 10.20 a.m.             |
| 3  | 160.9                           | 466.5                       | 23.0                             | 12. June, 3.25 p.m.              |
| 4  | 84.2                            | 244.1                       | 21.0                             | 5. October, 2.00 p.m.            |
| 5  | 57.4                            | 166.6                       | 10.0                             | 5. November, 12 a.m.             |
| 6  | 160.9                           | 466.5                       | 0.0                              | 19. January, 8.30 a.m.           |
| 7  | 160.9                           | 466.5                       | 0.0                              | 5. March, 9.50 a.m.              |
| 8  | 63.9                            | 185.3                       | 2.0                              | 8. March, 12.20 p.m.             |
| 9  | 57.4                            | 166.6                       | 12.0                             | 29. March, 1.00 p.m.             |
| 10 | 461.6                           | 1430.9                      | 2.0                              | 31. March, 10.00 a.m.            |
| 11 | 76.5                            | 221.9                       | 2.0                              | 31. March, 10.40 a.m.            |
| 12 | 84.2                            | 244.1                       | 3.0                              | 31. March, 2.20 p.m.             |
| 13 | 108.1                           | 313.5                       | 3.0                              | 31. March, 12.55 p.m.            |
| 14 | 59.5                            | 172.5                       | 3.0                              | 31. March, 1.20 p.m.             |
| 15 | 58.2                            | 168.7                       | 0.0                              | 1. April, 8.40 a.m.              |
| 16 | 57.4                            | 166.6                       | 0.0                              | 1. April, 9.00 a.m.              |
| 17 | 43.3                            | 125.7                       | -1.0                             | 4. April, 8.25 a.m.              |
| 18 | 61.9                            | 179.6                       | 0.0                              | 4. April, 9.50 a.m.              |
| 19 | 43.3                            | 125.7                       | 0.0                              | 4. April, 10.15 a.m.             |
| 20 | 46.3                            | 134.2                       | 0.0                              | 4. April, 10.40 a.m.             |
| 21 | 59.5                            | 172.5                       | 0.0                              | 4. April, 11.10 a.m.             |
| 22 | 57.4                            | 166.6                       | 3.0                              | 5. April, 10.40 a.m.             |
| 23 | 47.5                            | 137.7                       | 6.0                              | 21. April, 10.00 a.m.            |
| 24 | 46.3                            | 134.2                       | 6.0                              | 22. April, 10.20 a.m.            |
| 25 | 46.3                            | 134.2                       | 5.0                              | 22. April, 8.05 a.m.             |
| 26 | 59.5                            | 172.5                       | 5.0                              | 25. April, 8.30 a.m.             |
| 27 | 43.3                            | 125.7                       | 5.0                              | 25. April, 9.00 a.m.             |
| 28 | 46.3                            | 134.2                       | 6.0                              | 25. April, 10.00 a.m.            |
| 29 | 43.3                            | 125.7                       | 7.0                              | 25. April, 10.30 a.m.            |
| 30 | 50.6                            | 146.6                       | 7.0                              | 25. April, 11.00 a.m.            |
| 31 | 51.6                            | 149.7                       | 13.0                             | 28. April, 8.35 a.m.             |
| 32 | 47.5                            | 137.7                       | 13.0                             | 28. April, 9.00 a.m.             |
| 33 | 461.6                           | 1430.9                      | 14.0                             | 28. April, 9.50 a.m.             |
| 34 | 51.6                            | 149.7                       | 15.0                             | 28. April, 11.10 a.m.            |
| 35 | 461.6                           | 1430.9                      | 15.0                             | 28. April, 12.00 p.m.            |
| 36 | 57.4                            | 166.6                       | 15.0                             | 28. April, 12.30 p.m.            |
| 37 | 59.5                            | 172.5                       | 15.0                             | 28. April, 1.00 p.m.             |
| 38 | 58.2                            | 168.7                       | 16.0                             | 28. April, 1.30 p.m.             |
| 39 | 58.2                            | 168.7                       | 19.0                             | 8. May, 4.45 p.m.                |
| 40 | 461.6                           | 1430.9                      | 22.0                             | 13. May, 12.20 p.m.              |
| 41 | 160.9                           | 466.5                       | 17.0                             | 13. May, 8.00 a.m.               |
| 42 | 43.3                            | 125.7                       | 10.0                             | 16. May, 8.25 a.m.               |
| 43 | 50.6                            | 146.6                       | 10.0                             | 16. May, 8.50 a.m.               |
| 44 | 61.9                            | 179.6                       | 10.5                             | 16. May, 9.20 a.m.               |
| 45 | 43.3                            | 125.7                       | 12.0                             | 16. May, 10.05 a.m.              |
| 46 | 59.5                            | 172.5                       | 13.0                             | 16. May, 10.25 a.m.              |

|    |       |        |      |                         |
|----|-------|--------|------|-------------------------|
| 47 | 46.27 | 134.2  | 15.0 | 16. May, 10.40 a.m.     |
| 48 | 61.9  | 179.6  | 18.0 | 16. May, 11.10 a.m.     |
| 49 | 461.6 | 1430.9 | 10.0 | 17. May, 8.10 a.m.      |
| 50 | 46.3  | 134.2  | 12.0 | 17. May, 8.40 a.m.      |
| 51 | 160.9 | 466.5  | 6.0  | 18. May, 8.15 a.m.      |
| 52 | 58.2  | 168.7  | 8.0  | 18. May, 8.35 a.m.      |
| 53 | 50.6  | 146.6  | 8.5  | 18. May, 9.05 a.m.      |
| 54 | 57.4  | 166.6  | 10.0 | 18. May, 10.05 a.m.     |
| 55 | 46.3  | 134.2  | 10.5 | 18. May, 10.30 a.m.     |
| 56 | 58.2  | 168.7  | 14.0 | 18. May, 12.05 a.m.     |
| 57 | 108.1 | 313.5  | 8.0  | 23. May, 8.10 a.m.      |
| 58 | 43.3  | 125.7  | 10.0 | 23. May, 8.40 a.m.      |
| 59 | 46.3  | 134.2  | 13.0 | 23. May, 10.00 a.m.     |
| 60 | 47.5  | 137.7  | 13.0 | 23. May, 10.30 a.m.     |
| 61 | 43.3  | 125.7  | 13.0 | 23. May, 10.55 a.m.     |
| 62 | 46.3  | 134.2  | 13.5 | 24. May, 8.15 a.m.      |
| 63 | 58.2  | 168.7  | 16.0 | 24. May, 10.20 a.m.     |
| 64 | 59.5  | 172.5  | 17.0 | 24. May, 10.45 a.m.     |
| 65 | 63.9  | 185.3  | 19.0 | 24. May, 12.00 a.m.     |
| 66 | 160.9 | 466.5  | 17.0 | 3. June, 8.30 a.m.      |
| 67 | 59.5  | 172.5  | 25.0 | 9. June, 12.15 p.m.     |
| 68 | 96.0  | 284.2  | 26.0 | 7. June, 12.20 p.m.     |
| 69 | 96.0  | 284.2  | 24.0 | 9. June, 11.20 a.m.     |
| 70 | 49.0  | 136.7  | 22.0 | 10. June, 4.55 p.m.     |
| 71 | 41.7  | 116.3  | 20.0 | 10. June, 5.35 a.m.     |
| 72 | 24.8  | 69.2   | 17.0 | 11. June, 8.20 a.m.     |
| 73 | 49.0  | 136.7  | 19.0 | 11. June, 9.05 a.m.     |
| 74 | 49.9  | 139.3  | 20.0 | 11. June, 9.50 a.m.     |
| 75 | 50.5  | 141.0  | 21.0 | 11. June, 10.20 a.m.    |
| 76 | 24.6  | 68.5   | 22.0 | 11. June, 10.50 a.m.    |
| 77 | 41.7  | 116.3  | 22.0 | 11. June, 11.40 a.m.    |
| 78 | 50.5  | 141.0  | 25.0 | 12. June, 11.25 a.m.    |
| 79 | 96.0  | 284.2  | 22.0 | 12. June, 9.55 a.m.     |
| 80 | 146.4 | 546.0  | 8.0  | 18. October, 12.00 a.m. |
| 81 | 146.4 | 546.0  | 2.0  | 31. March, 12.00 a.m.   |
| 82 | 46.6  | 155.7  | 6.0  | 27. April, 8.05 a.m.    |
| 83 | 48.0  | 160.0  | 13.0 | 27. April, 2.10 p.m.    |
| 84 | 65.2  | 214.4  | 22.0 | 22. June, 2.00 p.m.     |
| 85 | 149.6 | 594.0  | 32.0 | 28. June, 11.30 a.m.    |
| 86 | 67.1  | 216.8  | 3.0  | 5. April, 10.10 a.m.    |
| 87 | 248.2 | 1228.5 | 27.0 | 25. June, 12.40 p.m.    |
| 88 | 132.9 | 556.8  | 23.0 | 23. June, 12.05 a.m.    |
| 89 | 65.3  | 212.8  | 25.0 | 25. June, 10.00 a.m.    |
| 90 | 128.6 | 541.3  | 26.0 | 25. June, 11.30 a.m.    |
| 91 | 128.6 | 541.3  | 26.0 | 27. June, 10.00 a.m.    |
| 92 | 128.6 | 541.3  | 27.5 | 27. June, 10.30 a.m.    |
